# Supplementary material for: CANTARE: finding and visualizing network-based multi-omic predictive models
Source: PubMed Central journal article supplement (PMC7896366; doi:10.1186/s12859-021-04016-8), 2021-02-19
Supplement: 12859_2021_4016_MOESM2_ESM.pdf [file 12859_2021_4016_MOESM2_ESM.pdf]

# Supplemental Figure 1 : Comparison of RF predicted probabilities for U and V forests

V forests are more similar to each other than to the U forests, while U forests are more similar to each other than to the V forests. rfU = random forest generated from the "universe" of multi-omic data. rfV = random forest generated from the Vnet.

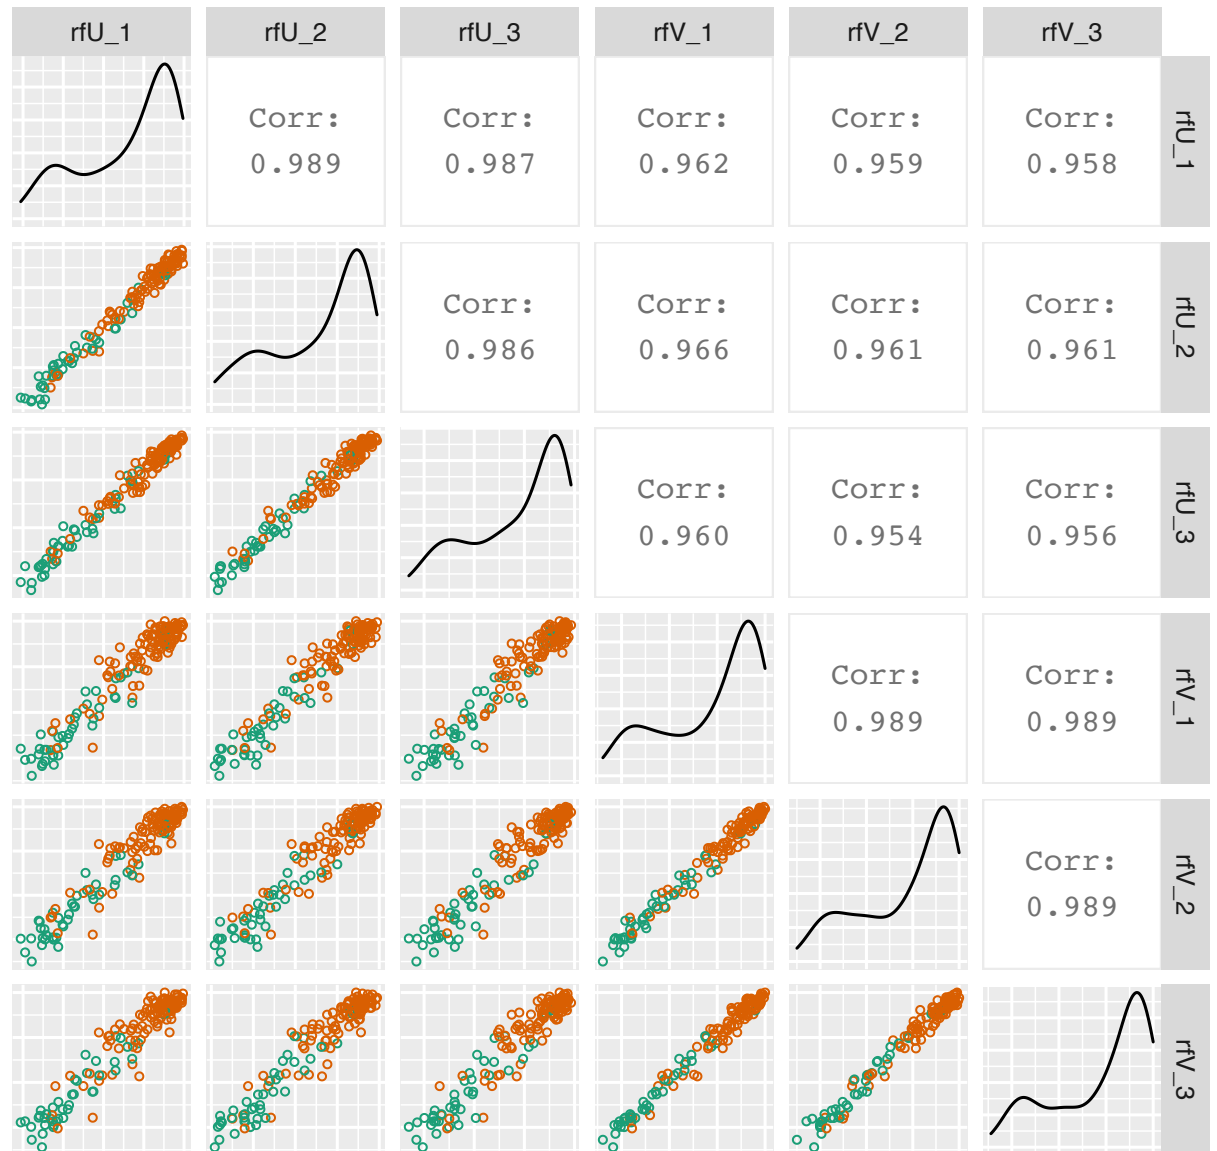

Cohort ○ Control ○ IBD
