# Supplementary material for: CANTARE: finding and visualizing network-based multi-omic predictive models
Source: PubMed Central journal article supplement (PMC7896366; doi:10.1186/s12859-021-04016-8), 2021-02-19
Supplement: 12859_2021_4016_MOESM3_ESM.pdf [file 12859_2021_4016_MOESM3_ESM.pdf]

# Supplemental Figure 2: Comparison of predicted probabilities for U and V penalized regressions

V regressions are more similar to each other than to the U regressions, while U regressions are more similar to each other than to the V regressions. prU = penalized regression generated from the "universe" of multi-omic data. prV = penalized regression generated from the Vnet. The models, prU\_1 and prU\_3 were duplicates of each other. In a separate analysis, the creation of 100 U regression models yielded 29 unique models. Thus, the duplication was not an aberration.

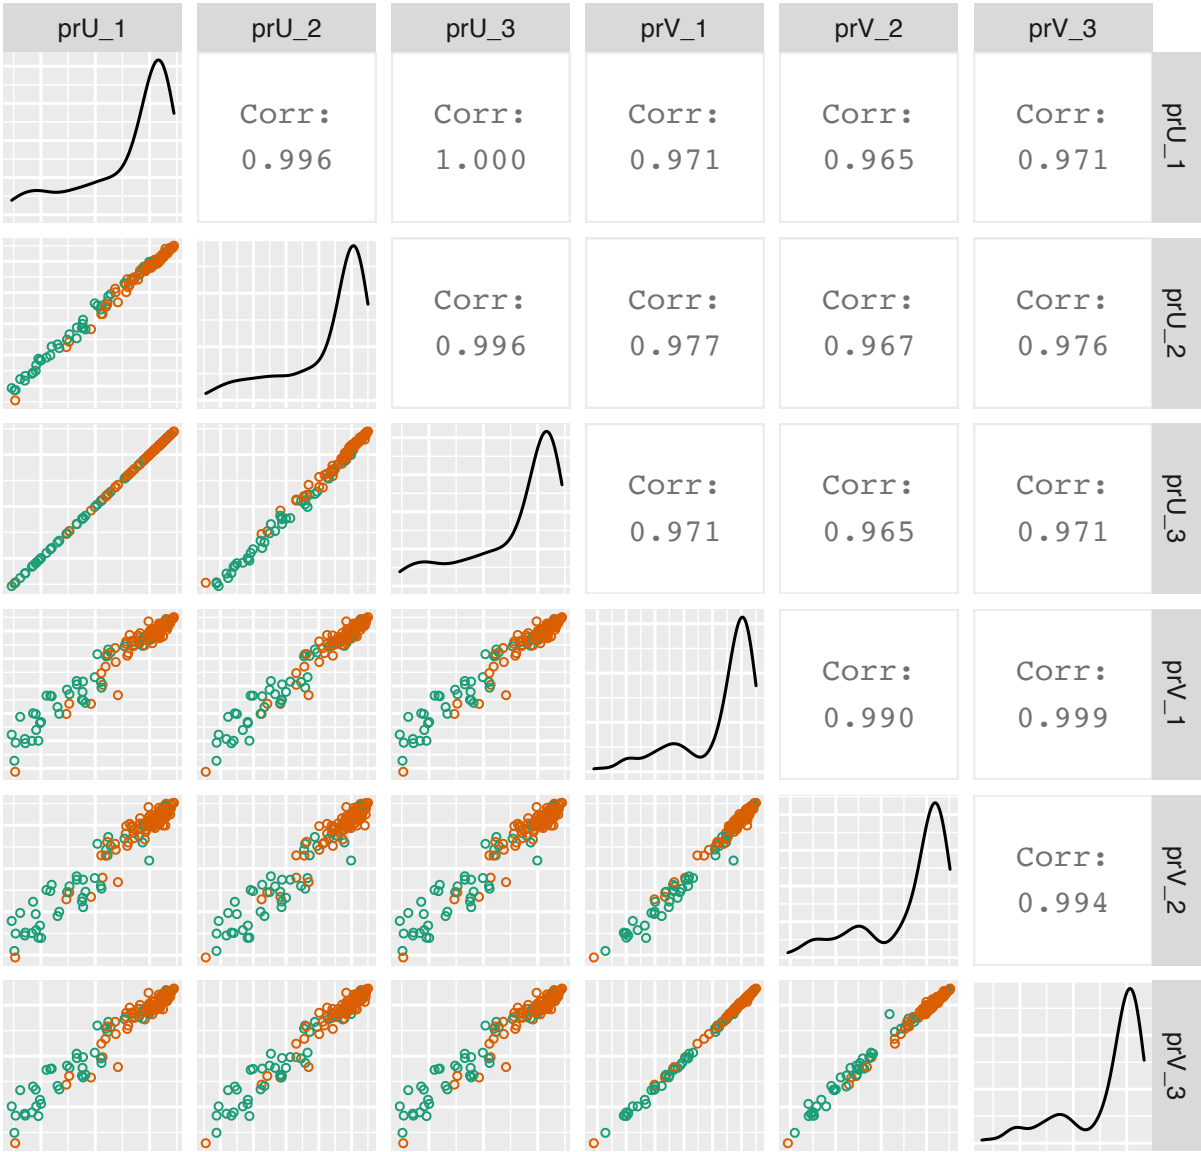

Cohort ○ Control ○ IBD
